# Supplementary material for: Antibacterial, angiogenic, and osteogenic activities of Ca, P, Co, F, and Sr compound doped titania coatings with different Sr content
Source: Sci Rep. 2019 Oct 2;9:14203. doi: 10.1038/s41598-019-50496-3 (PMC6775141; doi:10.1038/s41598-019-50496-3)
Supplement: Supplementary file 1 — Supplementary Information [file 41598_2019_50496_MOESM1_ESM.pdf]

## **Supplementary Information**

### **Antibacterial, angiogenic, and osteogenic activities of Ca, P, Co, F, and Sr compound doped titania coatings with different Sr content**

Jianhong Zhou<sup>1\*</sup>, Xiaoli Wang<sup>2</sup>, Lingzhou Zhao<sup>3</sup>

*<sup>1</sup> Institute of Physics & Optoelectronics Technology, Advanced Titanium Alloys and  
Functional Coatings Cooperative Innovation Center, Baoji University of Arts and  
Sciences, Baoji, 721016, China*

*<sup>2</sup> School of Marxism, Baoji University of Arts and Sciences, Baoji, 721016, China*

*<sup>3</sup> State Key Laboratory of Military Stomatology & National Clinical Research Center  
for Oral Diseases & Shaanxi Engineering Research Center for Dental Materials and  
Advanced Manufacture, School of Stomatology, The Fourth Military Medical  
University, Xi'an, 710032, China*

*\*Corresponding author at: Institute of Physics & Optoelectronics Technology,  
Advanced Titanium Alloys and Functional Coatings Cooperative Innovation Center,  
Baoji University of Arts and Sciences, Baoji, 721016, China*

*E-mail addresses: shanxixian198001@163.com (Jianhong Zhou)*

## Methods

### *Antibacterial activity evaluation*

The antimicrobial effect of the coatings as well as Ti was evaluated by the bacterial counting method with *E. coli* (ATCC10536) and *S. aureus* (ATCC6538) as the gram-negative and the gram-positive representative, respectively. The coatings were immersed in 10 ml phosphate buffer saline (PBS) at 37°C for 1, 14, and 28 days with the PBS refreshed every day. The coatings were then ultrasonically cleaned, sterilized and employed in the antimicrobial assay. The bacteria were cultured in the beef extractpeptone (BEP, HopeBio, China) medium under agitation for 18 h at 37 °C. After dilution with BEP to a concentration of  $1.0 \times 10^5$  CFU/ml, 1mL of the bacteria suspension was introduced onto each coating surface. The coatings with the bacteria suspension were incubated at 37 °C for 12h at a relative humidity of >90% in darkness. At the end of the incubation period, each coating was rinsed in phosphate buffer solution (PBS) and ultrasonically agitated to detach the bacteria from the sample. The viable bacteria in PBS were quantified by standard serial dilution and platecounting. The antibacterial activities at days 1, 14, and 28 of immersion were calculated using the following formula:  $R = (B - A)/B \times 100\%$ , where R is the antibacterial rate, and B and A are the mean numbers of viable bacteria (CFU) on the Ti control and the MNR samples, respectively.

Moreover, the antibacterial activities of the coatings at day 28 of immersion in PBS were vividly assayed by fluorescent staining. After incubation with the bacteria suspension for 12 h, each coating was rinsed with PBS to remove the nonadherent

bacteria. The adherent bacteria on each sample were stained with an acridine orange (AO)/propidium iodide (PI) mixture for 10 min and observed by fluorescence microscopy (DMI6000B Inverted Microscope, Leica, Germany).

**Table S1.** The corresponding MAO electrolyte compositions.

| Coatings | Aqueous electrolyte concentration (M) |                                    |                   |                |                 |
|----------|---------------------------------------|------------------------------------|-------------------|----------------|-----------------|
|          | Calcium acetate                       | $\beta$ -glycerophosphate disodium | Strontium acetate | Cobalt acetate | Sodium fluoride |
| TiCP     | 0.05                                  | 0.02                               | -                 | 0.04           | 0.1             |
| TiCP-S6  | 0.05                                  | 0.02                               | 0.05              | 0.04           | 0.1             |
| TiCP-S11 | 0.05                                  | 0.02                               | 0.10              | 0.04           | 0.1             |
| TiCP-S18 | 0.05                                  | 0.02                               | 0.15              | 0.04           | 0.1             |

**Table S2.** Primers used for qRT-PCR.

| Gene           | Forward primer sequence (5'-3') | Reverse primer sequence (5'-3') |
|----------------|---------------------------------|---------------------------------|
| Runx2          | TGGTGTGACGCTGATGGAA             | ATACCGCTGGACCACTGTTG            |
| BSP            | GTCAGAACTGCTGGGACTCG            | TGGCATTAGGTGTACTTGACAGT         |
| ALP            | CTGAGCGTCCTGTTCTGAGG            | GTTCTGGGTCCCCTTTCTG             |
| OPN            | GTGTACCCCACTGAGGATGC            | CACGTGTGAGCTGAGGTCTT            |
| OCN            | CTTCGTGTCCAAGAGGGAGC            | CAGGGGATCCGGGTAAGGA             |
| Col-I          | TGCAGGGCTCCAATGATGTT            | TGCAGGGCTCCAATGATGTT            |
| HIF-1 $\alpha$ | CGATGACACGGAACTGAAG             | CAGAGGCAGGTAATGGAGACA           |
| VEGF           | TTGAGTTGGGAGGAGGATGT            | TGGCAGGCAAACAGACTTC             |
| GAPDH          | ATCAAGTGGGGTGATGCTGG            | TACTTCTCGTGGTTCACGCC            |

**Table S3.** Elemental composition of the coatings surfaces detected by XPS.

| Coatings | Elemental composition (wt.%) |                |               |               |                |               |               |
|----------|------------------------------|----------------|---------------|---------------|----------------|---------------|---------------|
|          | Ti                           | O              | Ca            | P             | Sr             | Co            | F             |
| TiCP     | 42.5 $\pm$ 1.0               | 37.1 $\pm$ 1.2 | 6.1 $\pm$ 0.5 | 4.7 $\pm$ 0.6 | -              | 5.4 $\pm$ 0.7 | 4.2 $\pm$ 0.4 |
| TiCP-S6  | 38.6 $\pm$ 1.1               | 35.2 $\pm$ 1.3 | 5.8 $\pm$ 0.3 | 4.5 $\pm$ 0.5 | 6.3 $\pm$ 0.7  | 5.5 $\pm$ 0.4 | 4.1 $\pm$ 0.3 |
| TiCP-S11 | 35.8 $\pm$ 0.9               | 33.6 $\pm$ 1.0 | 5.6 $\pm$ 0.6 | 4.6 $\pm$ 0.5 | 11.4 $\pm$ 0.6 | 5.2 $\pm$ 0.6 | 3.8 $\pm$ 0.2 |
| TiCP-S18 | 32.3 $\pm$ 1.2               | 31.4 $\pm$ 0.9 | 5.5 $\pm$ 0.5 | 4.2 $\pm$ 0.7 | 17.6 $\pm$ 0.9 | 5.1 $\pm$ 0.6 | 3.9 $\pm$ 0.3 |

**Table S4.** Roughness values and contact angles of pristine Ti and the coatings.

| Coatings | Roughness (nm) |            |              | Contact angle<br>(deg.) | BET surface<br>areas (m <sup>2</sup> /g) |
|----------|----------------|------------|--------------|-------------------------|------------------------------------------|
|          | Ra             | RMS        | Rz           |                         |                                          |
| Ti       | 7.2±2.1        | 8.9±1.7    | 36.8±4.9     | 125.4±5.1               | 0.13                                     |
| TiCP     | 462.7±41.8     | 456.9±41.8 | 1273.4±141.6 | 47.6±4.1                | 5.65                                     |
| TiCP-S6  | 459.3±42.5     | 481.3±37.6 | 1231.2±138.5 | 46.3±4.5                | 5.49                                     |
| TiCP-S11 | 460.6±39.2     | 478.6±34.5 | 1213.6±151.8 | 48.1±3.9                | 5.58                                     |
| TiCP-S18 | 468.4±40.6     | 485.7±36.8 | 1206.8±146.2 | 45.7±5.2                | 5.61                                     |
